# Supplementary material
Source: publisher figshare collection journal article supplement (https://geolsoc.figshare.com/ndownloader/files/22089576)
Supplement: Supplementary file 1 [file 22089576]

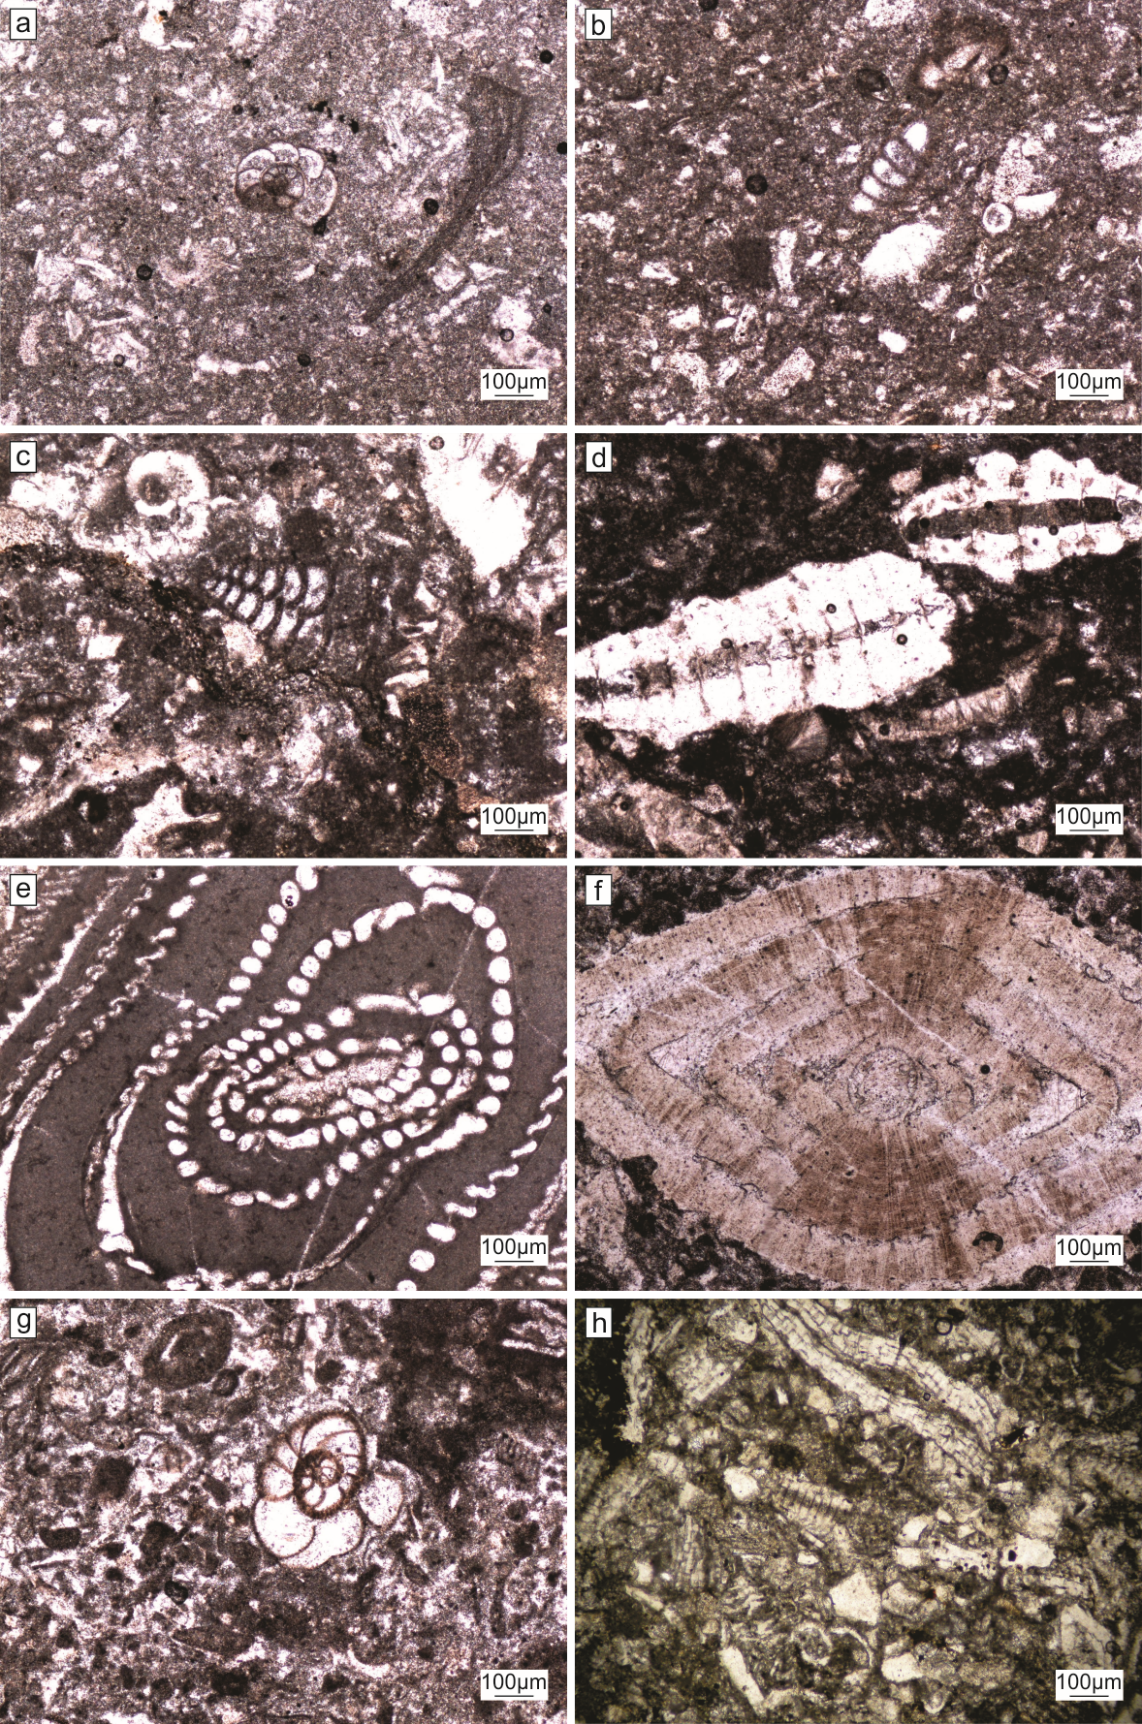


**Fig. S.1.** Fossiliferous carbonate clasts containing benthic foraminifera such as (**a**, **b**) Dendritina rangi, (**c**) Textularia, and (**d**) Miogypsinoides complanata in the Lahbari conglomerate, and benthic foraminifers including (**e**) Neoalveolina pygmaea, (**f**) Nummulites vascus, (**g**) Dendritina rangi, and (**h**) Eulepidina dilatata in the Bakhtyari conglomerate.


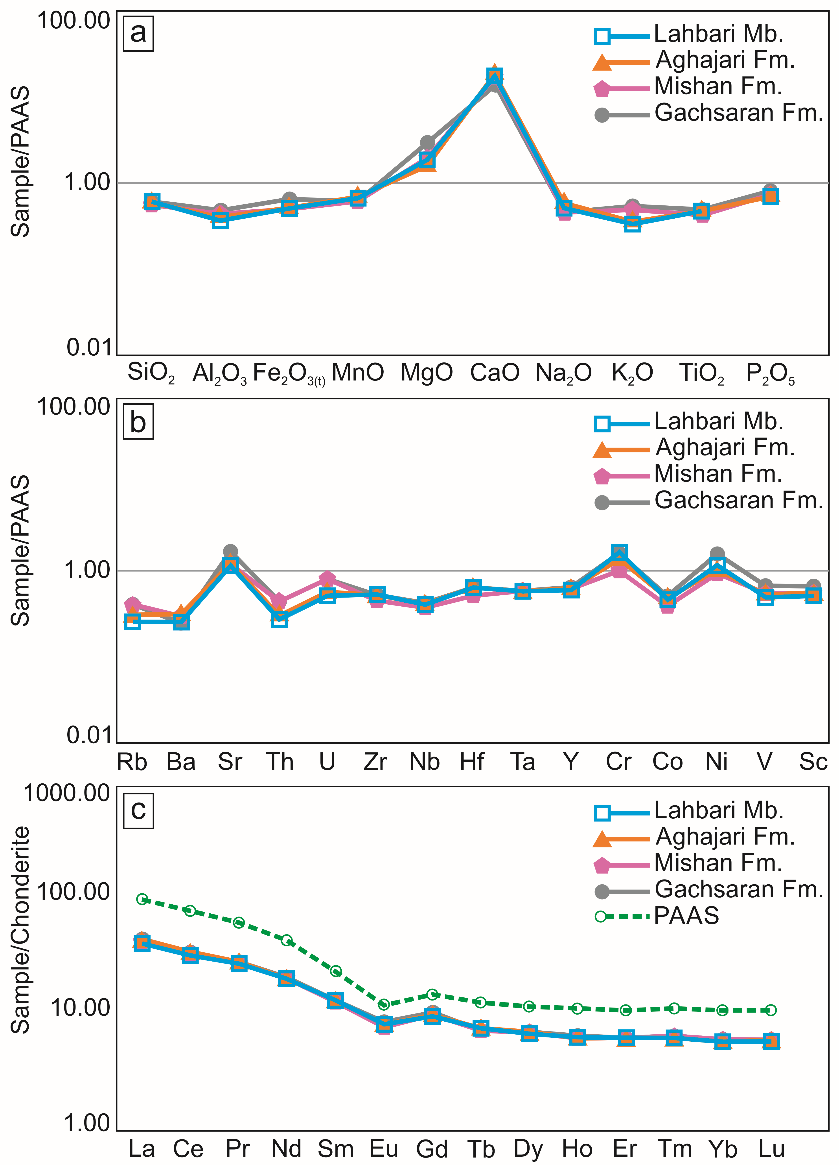


**Fig. S.2.** PAAS-normalized multi-element plots of average major and trace element abundances of the Gachsaran, Mishan, lower Aghajari, and Lahbari mudrocks (**a**, **b**). The trace elements are ordered with the large ion-lithophile elements (LILE) on the left (Rb-U), followed by high field strength elements (HFSE) on the right (Zr-Y) and transition metals (Cr-Sc). (**c**) Average Chondrite-normalized REE plots for the studied mudrocks and PAAS, showing LREE enrichment, negative Eu anomaly and flat HREE. PAAS and chondrite data are from Taylor and McLennan (1985).


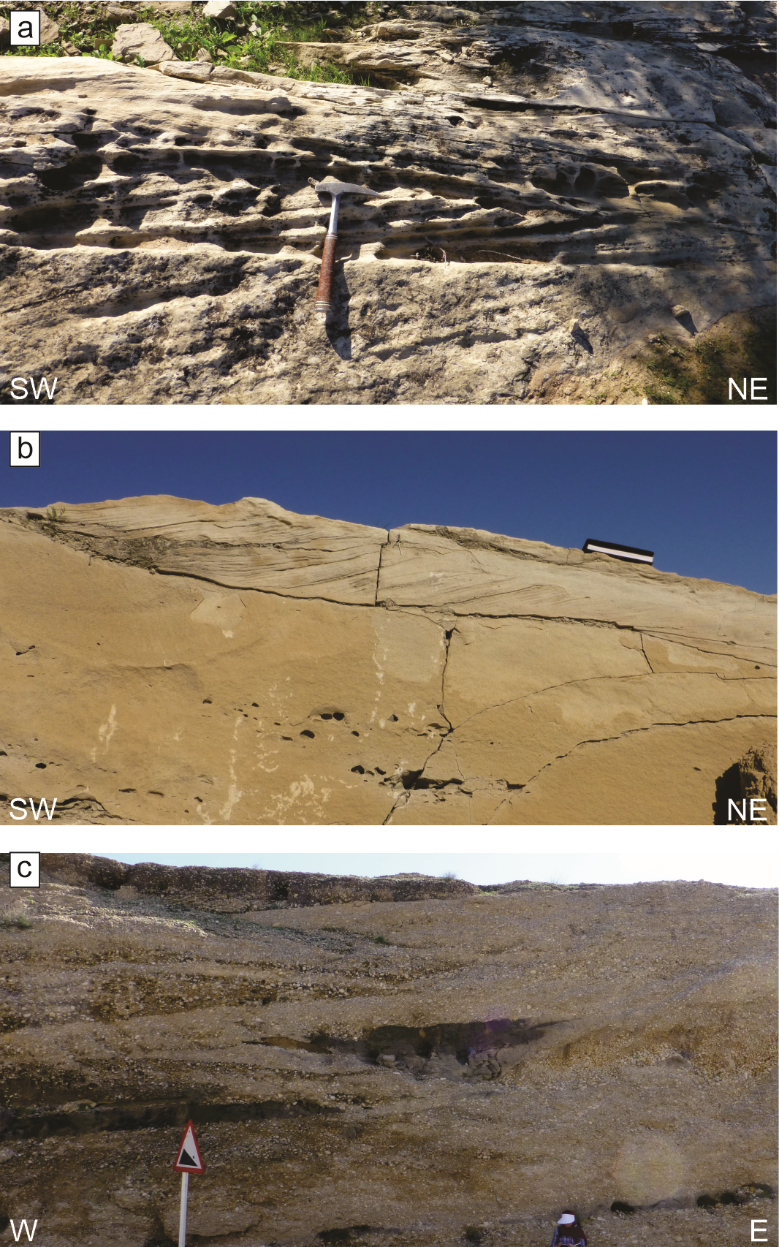


**Fig. S.3.** Paleocurrent indicators including herringbone cross stratification in the lower Aghajari Formation (**a**), cross stratification in the Lahbari Member (**b**), and channel orientation and gravel imbrication in the Bakhtyari Formation (**c**).


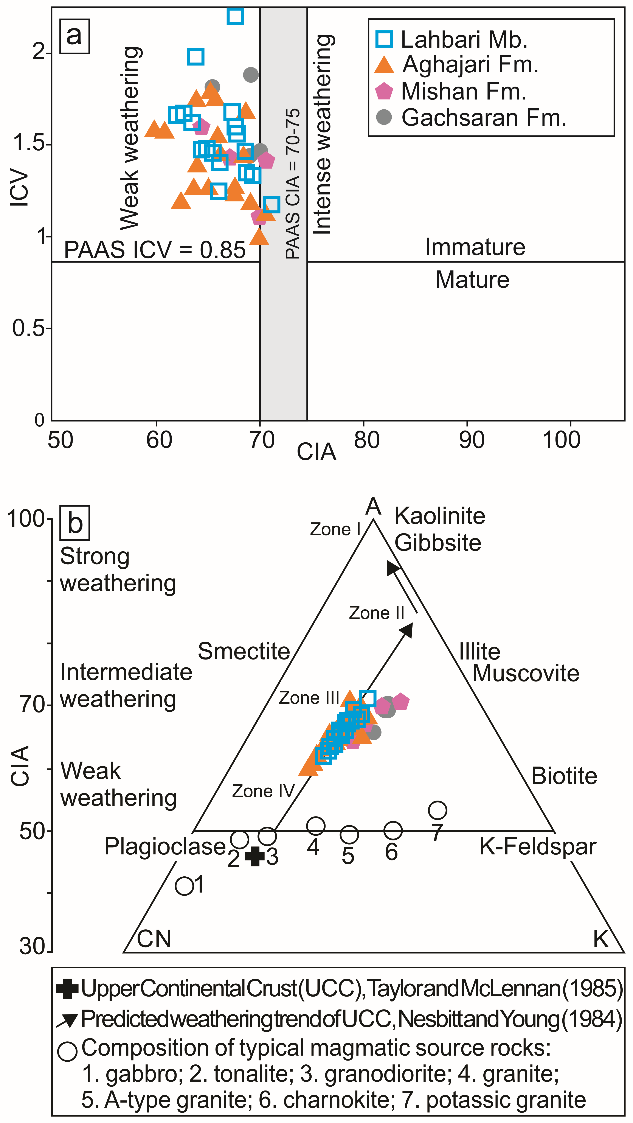


**Fig. S.4.** Evaluating the influence of chemical weathering and recycling on the composition of studied sediments. (**a**) Plot of ICV versus CIA for studied mudrocks showing their compositionally immature nature. (**b**) The Al2O3-CaO+Na2O-K2O diagram (Nesbitt and Young, 1984) indicating low to moderate weathering conditions in the source regions of the studied mudrocks.

**Table S.1.** *Summary of conglomerate clast counts in the Bakhtyari Formation*

| Sample No. | Carbonate | Radiolarian Chert | Evaporite | Conglomerate | Siliciclastic | Metamorphic | Total |
| --- | --- | --- | --- | --- | --- | --- | --- |
| Sd 20 | 178 | 38 | 0 | 0 | 0 | 0 | 216 |
| Sd 21 | 173 | 27 | 0 | 0 | 0 | 0 | 200 |
| Sd 22 | 182 | 18 | 0 | 0 | 0 | 0 | 200 |

**Table S.2.** *Framework parameters of detrital modes (Ingersoll and Suczek, 1979)*

| Qm | Monocrystalline quartz |
| --- | --- |
| Qm nu | Non-undulouse monocrystalline quartz |
| Qm u | Undulouse monocrystalline quartz |
| Qp 2-3 | Qp 2–3 crystal units per grain |
| Qp >3 | Qp > 3 crystal units per grain |
| Cht | Chert |
| Qp | Polycrystalline quartzose (or calcedonic) lithic fragments (Qp 2-3+ Qp >3 + Cht) |
| Qt | Total quartzose grains (Qm + Qp) |
| Kf | Potassium feldspar |
| Plg | Plagioclase feldspar |
| F | Total feldspar grains (P + K) |
| Ls | Sedimentary rock fragments |
| Lv | Volcanic rock fragments |
| Lm | Metamorphic rock fragments |
| Lc | Carbonate (reworked fossils and limeclasts include mudstone) rock fragments |
| L | Unstable (siliciclastic) lithic fragments (Lv + Ls + Lm + Lc) |
| Lt | Total siliciclastic lithic fragments (L + Qp) |
| RF | Total unstable rock fragments and chert used for Folk (1974) classification |
| Acc | Accessory minerals |

**Table S.3.** *Detrital modes and MIA index (Johnsson and others, 1993) of 69 selected samples from the Asmari (Ahwaz sandstones) and the Aghajari (including the Lahbari Mb.) formations*

| Fm | Sample No. | Qm nu | Qm u | Qp 2-3 | Qp >3 | Plg | Kf | Lv | Lm | Ls | Lc | Cht | Acc | Total | Q | RF | F | Qt | L | Qm | Lt | MIA |
| --- | --- | --- | --- | --- | --- | --- | --- | --- | --- | --- | --- | --- | --- | --- | --- | --- | --- | --- | --- | --- | --- | --- |
| Asmari | 3797 | 79 | 22 | 1 | 0 | 1 | 0 | 0 | 0 | 0 | 0 | 0 | 0 | 103 | 102 | 0 | 1 | 102 | 0 | 101 | 1 | 99.03 |
| 3775 | 55 | 39 | 2 | 1 | 0 | 4 | 0 | 0 | 0 | 0 | 0 | 0 | 101 | 97 | 0 | 4 | 97 | 0 | 94 | 3 | 96.04 |
| 3771 | 80 | 11 | 0 | 1 | 2 | 10 | 0 | 0 | 0 | 0 | 0 | 1 | 105 | 92 | 0 | 12 | 92 | 0 | 91 | 1 | 88.46 |
| 3769 | 71 | 29 | 1 | 0 | 0 | 0 | 0 | 0 | 0 | 0 | 0 | 0 | 101 | 101 | 0 | 0 | 101 | 0 | 100 | 1 | 100 |
| 3760 | 58 | 29 | 2 | 7 | 0 | 4 | 0 | 0 | 1 | 0 | 0 | 0 | 101 | 96 | 1 | 4 | 96 | 1 | 87 | 10 | 96.00 |
| 3743 | 60 | 34 | 0 | 0 | 2 | 5 | 0 | 0 | 0 | 0 | 0 | 0 | 101 | 94 | 0 | 7 | 94 | 0 | 94 | 0 | 93.07 |
| 3731 | 95 | 8 | 0 | 0 | 0 | 5 | 0 | 0 | 0 | 0 | 0 | 0 | 108 | 103 | 0 | 5 | 103 | 0 | 103 | 0 | 95.37 |
| 3728 | 83 | 14 | 1 | 3 | 1 | 4 | 0 | 0 | 0 | 0 | 0 | 0 | 106 | 101 | 0 | 5 | 101 | 0 | 97 | 4 | 95.28 |
| 3725 | 83 | 17 | 1 | 1 | 0 | 0 | 0 | 0 | 0 | 0 | 0 | 0 | 102 | 102 | 0 | 0 | 102 | 0 | 100 | 2 | 100 |
| 3722 | 80 | 16 | 0 | 2 | 1 | 1 | 0 | 0 | 0 | 0 | 0 | 0 | 100 | 98 | 0 | 2 | 98 | 0 | 96 | 2 | 98.00 |
| 3719 | 89 | 9 | 0 | 1 | 2 | 1 | 0 | 0 | 0 | 0 | 0 | 0 | 102 | 99 | 0 | 3 | 99 | 0 | 98 | 1 | 97.06 |
| 3710 | 81 | 19 | 0 | 0 | 2 | 0 | 0 | 0 | 0 | 0 | 0 | 0 | 102 | 100 | 0 | 2 | 100 | 0 | 100 | 0 | 98.04 |
| 3696 | 84 | 8 | 2 | 3 | 1 | 4 | 0 | 1 | 0 | 0 | 1 | 0 | 104 | 97 | 2 | 5 | 98 | 1 | 92 | 7 | 95.10 |
| 3693 | 79 | 16 | 0 | 1 | 2 | 8 | 0 | 0 | 0 | 0 | 0 | 1 | 107 | 96 | 0 | 10 | 96 | 0 | 95 | 1 | 90.57 |
| 3687 | 84 | 12 | 2 | 0 | 2 | 8 | 0 | 0 | 0 | 0 | 0 | 0 | 108 | 98 | 0 | 10 | 98 | 0 | 96 | 2 | 90.74 |
| 3681 | 86 | 10 | 1 | 2 | 0 | 5 | 0 | 0 | 0 | 0 | 0 | 0 | 104 | 99 | 0 | 5 | 99 | 0 | 96 | 3 | 95.19 |
| 3672 | 84 | 27 | 1 | 2 | 0 | 0 | 0 | 0 | 0 | 0 | 0 | 0 | 114 | 114 | 0 | 0 | 114 | 0 | 111 | 3 | 100 |
| 3666 | 70 | 25 | 0 | 2 | 0 | 6 | 0 | 0 | 0 | 0 | 0 | 0 | 103 | 97 | 0 | 6 | 97 | 0 | 95 | 2 | 94.17 |
| 3648 | 52 | 41 | 0 | 2 | 3 | 3 | 0 | 0 | 2 | 0 | 0 | 0 | 103 | 95 | 2 | 6 | 95 | 2 | 93 | 4 | 94.06 |
| 3645 | 83 | 13 | 2 | 0 | 1 | 2 | 0 | 0 | 0 | 0 | 0 | 0 | 101 | 98 | 0 | 3 | 98 | 0 | 96 | 2 | 97.03 |
| 3642 | 59 | 33 | 1 | 4 | 1 | 5 | 0 | 0 | 0 | 0 | 0 | 0 | 103 | 97 | 0 | 6 | 97 | 0 | 92 | 5 | 94.17 |
| 3630 | 79 | 29 | 2 | 2 | 0 | 0 | 0 | 0 | 1 | 0 | 0 | 0 | 113 | 112 | 1 | 0 | 112 | 1 | 108 | 5 | 100 |
| 3624 | 67 | 32 | 1 | 3 | 0 | 4 | 0 | 0 | 0 | 0 | 0 | 0 | 107 | 103 | 0 | 4 | 103 | 0 | 99 | 4 | 96.26 |
| 3622 | 55 | 40 | 0 | 1 | 1 | 2 | 0 | 0 | 2 | 0 | 0 | 0 | 101 | 96 | 2 | 3 | 96 | 2 | 95 | 3 | 96.97 |
| 3612 | 64 | 31 | 0 | 2 | 0 | 1 | 0 | 0 | 3 | 0 | 0 | 0 | 101 | 97 | 3 | 1 | 97 | 3 | 95 | 5 | 98.98 |
| 3574 | 59 | 35 | 1 | 1 | 1 | 4 | 0 | 0 | 0 | 0 | 0 | 0 | 101 | 96 | 0 | 5 | 96 | 0 | 94 | 2 | 95.05 |
| 3569 | 81 | 18 | 1 | 0 | 0 | 0 | 0 | 0 | 0 | 0 | 1 | 0 | 101 | 100 | 1 | 0 | 101 | 0 | 99 | 2 | 100 |
| 3559 | 72 | 22 | 0 | 1 | 2 | 1 | 0 | 0 | 2 | 0 | 1 | 0 | 101 | 95 | 3 | 3 | 96 | 2 | 94 | 4 | 96.94 |
| 3545 | 76 | 26 | 0 | 0 | 0 | 0 | 0 | 0 | 0 | 0 | 0 | 0 | 102 | 102 | 0 | 0 | 102 | 0 | 102 | 0 | 100 |
| Aghajari | Sd-6 | 15 | 14 | 0 | 34 | 5 | 14 | 16 | 73 | 45 | 70 | 12 | 2 | 300 | 63 | 216 | 19 | 75 | 204 | 29 | 250 | 76.83 |
| Sd-7 | 62 | 23 | 0 | 16 | 1 | 13 | 14 | 38 | 26 | 82 | 20 | 5 | 300 | 101 | 180 | 14 | 121 | 160 | 85 | 196 | 87.83 |
| Sd-8 | 36 | 19 | 3 | 31 | 11 | 14 | 14 | 56 | 37 | 54 | 24 | 1 | 300 | 89 | 185 | 25 | 113 | 161 | 55 | 219 | 78.07 |
| Sd-10 | 22 | 11 | 3 | 34 | 3 | 14 | 29 | 81 | 48 | 50 | 8 | 6 | 309 | 70 | 216 | 17 | 78 | 208 | 33 | 253 | 80.46 |

**Table S.3** *(continue)*

| Fm | Sample No. | Qm non | Qm un | Qp 2-3 | Qp >3 | P | K | Lv | Lm | Ls | Lc | Cht | Acc | Total | Q | RF | F | Qt | L | Qm | Lt | MIA |
| --- | --- | --- | --- | --- | --- | --- | --- | --- | --- | --- | --- | --- | --- | --- | --- | --- | --- | --- | --- | --- | --- | --- |
| Aghajari | 9 | 57 | 22 | 3 | 19 | 0 | 29 | 3 | 38 | 27 | 81 | 13 | 8 | 300 | 101 | 162 | 29 | 114 | 149 | 79 | 184 | 77.69 |
| Sd-11 | 29 | 15 | 5 | 44 | 34 | 36 | 29 | 56 | 32 | 13 | 9 | 1 | 303 | 93 | 139 | 70 | 102 | 130 | 44 | 188 | 57.06 |
| 13 | 61 | 8 | 2 | 34 | 4 | 14 | 12 | 65 | 20 | 58 | 16 | 9 | 303 | 105 | 171 | 18 | 121 | 155 | 69 | 207 | 85.37 |
| 14 | 20 | 4 | 3 | 28 | 11 | 15 | 32 | 73 | 32 | 49 | 33 | 0 | 300 | 55 | 219 | 26 | 88 | 186 | 24 | 250 | 67.90 |
| 16 | 34 | 4 | 2 | 19 | 14 | 25 | 36 | 46 | 17 | 68 | 20 | 15 | 300 | 59 | 187 | 39 | 79 | 167 | 38 | 208 | 60.20 |
| Sd-12 | 22 | 8 | 2 | 20 | 6 | 20 | 42 | 69 | 27 | 65 | 23 | 4 | 308 | 52 | 226 | 26 | 75 | 203 | 30 | 248 | 66.67 |
| 17 | 24 | 10 | 3 | 13 | 5 | 21 | 15 | 68 | 23 | 99 | 13 | 8 | 302 | 50 | 218 | 26 | 63 | 205 | 34 | 234 | 65.79 |
| 19 | 61 | 19 | 6 | 16 | 8 | 39 | 8 | 68 | 19 | 48 | 4 | 7 | 303 | 102 | 147 | 47 | 106 | 143 | 80 | 169 | 68.46 |
| Sd-13 | 67 | 16 | 4 | 24 | 8 | 23 | 17 | 30 | 34 | 67 | 9 | 8 | 307 | 111 | 157 | 31 | 120 | 148 | 83 | 185 | 78.17 |
| 21 | 40 | 8 | 0 | 23 | 5 | 22 | 11 | 33 | 15 | 107 | 32 | 4 | 300 | 71 | 198 | 27 | 103 | 166 | 48 | 221 | 72.45 |
| 26 | 42 | 9 | 4 | 42 | 18 | 17 | 24 | 43 | 22 | 56 | 14 | 11 | 302 | 97 | 159 | 35 | 111 | 145 | 51 | 205 | 73.48 |
| 27 | 26 | 11 | 2 | 63 | 14 | 23 | 43 | 30 | 31 | 37 | 20 | 2 | 302 | 102 | 161 | 37 | 122 | 141 | 37 | 226 | 73.38 |
| Sd-14 | 35 | 18 | 3 | 21 | 4 | 16 | 7 | 20 | 41 | 59 | 63 | 13 | 300 | 77 | 190 | 20 | 140 | 127 | 53 | 214 | 79.38 |
| 29 | 15 | 11 | 3 | 18 | 5 | 10 | 9 | 15 | 32 | 130 | 50 | 2 | 300 | 47 | 236 | 15 | 97 | 186 | 26 | 257 | 75.81 |
| 31 | 36 | 22 | 2 | 37 | 4 | 7 | 0 | 12 | 21 | 117 | 36 | 6 | 300 | 97 | 186 | 11 | 133 | 150 | 58 | 225 | 89.81 |
| 32 | 27 | 10 | 1 | 29 | 2 | 4 | 6 | 18 | 22 | 129 | 48 | 4 | 300 | 67 | 223 | 6 | 115 | 175 | 37 | 253 | 91.78 |
| 34 | 63 | 17 | 2 | 23 | 7 | 9 | 1 | 15 | 28 | 64 | 60 | 11 | 300 | 105 | 168 | 16 | 165 | 108 | 80 | 193 | 86.78 |
| Sd-15 | 24 | 5 | 1 | 17 | 3 | 7 | 11 | 8 | 52 | 65 | 97 | 10 | 300 | 47 | 233 | 10 | 144 | 136 | 29 | 251 | 82.46 |
| 37 | 45 | 13 | 2 | 27 | 5 | 12 | 11 | 19 | 37 | 75 | 50 | 4 | 300 | 87 | 192 | 17 | 137 | 142 | 58 | 221 | 83.65 |
| 39 | 32 | 12 | 4 | 24 | 6 | 16 | 5 | 19 | 22 | 94 | 61 | 5 | 300 | 72 | 201 | 22 | 133 | 140 | 44 | 229 | 76.60 |
| 40 | 28 | 10 | 1 | 16 | 4 | 13 | 4 | 12 | 52 | 79 | 73 | 8 | 300 | 55 | 220 | 17 | 128 | 147 | 38 | 237 | 76.39 |
| 43 | 43 | 21 | 2 | 16 | 6 | 10 | 7 | 9 | 32 | 65 | 77 | 12 | 300 | 82 | 190 | 16 | 159 | 113 | 64 | 208 | 83.67 |
| 45 | 18 | 8 | 3 | 27 | 1 | 13 | 6 | 8 | 56 | 87 | 60 | 13 | 300 | 56 | 217 | 14 | 116 | 157 | 26 | 247 | 80.00 |
| Aghajari (Lahbari Member) | 47 | 33 | 14 | 4 | 10 | 2 | 13 | 3 | 7 | 48 | 41 | 106 | 19 | 300 | 61 | 205 | 15 | 167 | 99 | 47 | 219 | 80.26 |
| 49 | 21 | 7 | 3 | 10 | 2 | 10 | 6 | 2 | 47 | 39 | 137 | 16 | 300 | 41 | 231 | 12 | 178 | 94 | 28 | 244 | 77.36 |
| 52 | 37 | 14 | 2 | 25 | 2 | 7 | 2 | 12 | 29 | 94 | 67 | 9 | 300 | 78 | 204 | 9 | 145 | 137 | 51 | 231 | 89.66 |
| 56-1 | 26 | 12 | 4 | 25 | 6 | 6 | 7 | 8 | 40 | 63 | 98 | 5 | 300 | 67 | 216 | 12 | 165 | 118 | 38 | 245 | 84.81 |
| 58 | 18 | 8 | 4 | 15 | 3 | 9 | 4 | 11 | 27 | 111 | 86 | 4 | 300 | 45 | 239 | 12 | 131 | 153 | 26 | 258 | 78.95 |
| 61 | 6 | 3 | 0 | 6 | 4 | 9 | 1 | 1 | 46 | 45 | 177 | 2 | 300 | 15 | 270 | 13 | 192 | 93 | 9 | 276 | 53.57 |
| 66 | 55 | 16 | 5 | 29 | 10 | 14 | 1 | 15 | 23 | 97 | 34 | 1 | 300 | 105 | 170 | 24 | 139 | 136 | 71 | 204 | 81.40 |
| 68 | 31 | 11 | 3 | 32 | 7 | 14 | 7 | 14 | 25 | 81 | 74 | 1 | 300 | 77 | 201 | 21 | 151 | 127 | 42 | 236 | 78.57 |
| 78 | 17 | 4 | 2 | 15 | 3 | 9 | 2 | 15 | 28 | 77 | 128 | 0 | 300 | 38 | 250 | 12 | 166 | 122 | 21 | 267 | 76.00 |
| 80 | 43 | 14 | 2 | 25 | 3 | 18 | 5 | 14 | 18 | 93 | 64 | 1 | 300 | 84 | 194 | 21 | 148 | 130 | 57 | 221 | 80.00 |
| 82 | 42 | 31 | 5 | 30 | 8 | 15 | 3 | 12 | 28 | 69 | 49 | 8 | 300 | 108 | 161 | 23 | 157 | 112 | 73 | 196 | 82.44 |
| 84 | 15 | 14 | 2 | 40 | 5 | 10 | 11 | 22 | 41 | 103 | 34 | 3 | 300 | 71 | 211 | 15 | 105 | 177 | 29 | 253 | 82.56 |
| 86 | 58 | 24 | 2 | 27 | 7 | 17 | 5 | 12 | 14 | 89 | 38 | 7 | 300 | 111 | 158 | 24 | 149 | 120 | 82 | 187 | 82.22 |

**Table S.4.** *Major element concentrations (wt%), CIA (Nesbitt and Young, 1982) and ICV (Cox et al., 1995) indices, and SiO2/Al2O3 ratio for mudrocks of the Gachsaran, Mishan, and Aghajari (including the Lahbari Mb.) formations*

| Fm | Sample No. | SiO2 | Al2O3 | Fe2O3 | MnO | MgO | CaO | Na2O | K2O | TiO2 | P2O5 | LOI | Total | CIA | ICV | SiO2/Al2O3 |
| --- | --- | --- | --- | --- | --- | --- | --- | --- | --- | --- | --- | --- | --- | --- | --- | --- |
| Gachsaran | DZ-87 | 46.35 | 10.54 | 5.4 | 0.07 | 8.73 | 10.82 | 0.81 | 2.53 | 0.66 | 0.14 | 13.9 | 99.95 | 65.53 | 1.80 | 4.40 |
| DZ-89 | 36.48 | 8.82 | 4.07 | 0.06 | 5.02 | 20.06 | 0.52 | 1.97 | 0.44 | 0.14 | 22.35 | 99.93 | 69.16 | 1.43 | 4.14 |
| DZ-90 | 36.02 | 9.72 | 4.41 | 0.07 | 5.97 | 19.81 | 0.52 | 2.15 | 0.48 | 0.13 | 22.44 | 101.72 | 70.19 | 1.45 | 3.71 |
| DZ-91 | 31.87 | 6.68 | 3.11 | 0.07 | 6.72 | 22.85 | 0.38 | 1.52 | 0.36 | 0.1 | 25.56 | 99.22 | 69.29 | 1.88 | 4.77 |
| Mishan | DZ-92 | 33.12 | 6.61 | 2.54 | 0.06 | 4.82 | 25.49 | 0.62 | 1.39 | 0.42 | 0.11 | 25.44 | 100.62 | 64.41 | 1.58 | 5.01 |
| DZ-93 | 36.89 | 7.76 | 3.34 | 0.07 | 4.38 | 20.72 | 0.59 | 1.62 | 0.42 | 0.11 | 22.57 | 98.47 | 67.15 | 1.42 | 4.75 |
| DZ-94 | 35.39 | 9.73 | 3.92 | 0.07 | 3.08 | 22.32 | 0.56 | 2.06 | 0.43 | 0.14 | 22.48 | 100.18 | 70.00 | 1.10 | 3.64 |
| DZ-1 | 32.74 | 8.4 | 3.35 | 0.06 | 5.2 | 22.34 | 0.38 | 2.01 | 0.4 | 0.11 | 24.13 | 99.12 | 70.64 | 1.40 | 3.90 |
| Aghajari | DZ-2 | 30.22 | 6.94 | 2.6 | 0.07 | 2.94 | 26.46 | 0.6 | 1.52 | 0.38 | 0.1 | 25.51 | 97.34 | 65.08 | 1.26 | 4.35 |
| DZ-4 | 36.67 | 10.1 | 4.64 | 0.08 | 3.81 | 22.06 | 0.73 | 2.12 | 0.55 | 0.13 | 21.03 | 101.92 | 67.68 | 1.25 | 3.63 |
| DZ-6 | 43.18 | 12.14 | 4.86 | 0.09 | 5.06 | 15.36 | 1.03 | 2.05 | 0.69 | 0.14 | 17.01 | 101.61 | 67.72 | 1.22 | 3.56 |
| DZ-8 | 30.43 | 6.43 | 2.53 | 0.06 | 3.92 | 26.79 | 0.56 | 1.23 | 0.37 | 0.1 | 26.38 | 98.8 | 66.28 | 1.44 | 4.73 |
| DZ-8b | 31.18 | 6.83 | 2.83 | 0.06 | 4.16 | 27.82 | 0.5 | 1.29 | 0.4 | 0.1 | 25.88 | 101.05 | 68.59 | 1.43 | 4.57 |
| DZ-10 | 39.23 | 9.68 | 4.64 | 0.08 | 2.97 | 21.27 | 0.74 | 1.62 | 0.57 | 0.12 | 19.8 | 100.72 | 69.16 | 1.17 | 4.05 |
| DZ-12 | 45.6 | 12.89 | 5.62 | 0.09 | 2.24 | 15.98 | 0.9 | 2.21 | 0.68 | 0.14 | 15.36 | 101.71 | 70.06 | 0.98 | 3.54 |
| DZ-15 | 44.1 | 9.98 | 4.45 | 0.07 | 3.14 | 17.39 | 0.73 | 1.5 | 0.52 | 0.15 | 18.87 | 100.9 | 70.62 | 1.12 | 4.42 |
| DZ-18 | 34.69 | 6.93 | 2.96 | 0.07 | 1.89 | 26 | 0.84 | 1.15 | 0.44 | 0.11 | 23.52 | 98.6 | 62.52 | 1.18 | 5.01 |
| DZ-22 | 35.1 | 3.98 | 1.75 | 0.05 | 2.36 | 28.95 | 0.56 | 0.67 | 0.29 | 0.06 | 26.35 | 100.12 | 59.90 | 1.57 | 8.82 |
| DZ-24 | 35.13 | 6.2 | 2.38 | 0.06 | 2.56 | 27.62 | 0.68 | 1.08 | 0.37 | 0.09 | 24.34 | 100.51 | 63.76 | 1.26 | 5.67 |
| DZ-25 | 33.92 | 6.78 | 2.93 | 0.07 | 3.27 | 26.18 | 0.71 | 1.24 | 0.41 | 0.11 | 24.73 | 100.35 | 64.08 | 1.38 | 5.00 |
| DZ-35 | 33.4 | 6.32 | 3.08 | 0.07 | 3.9 | 23.51 | 0.6 | 1.09 | 0.4 | 0.11 | 24.85 | 97.33 | 65.99 | 1.54 | 5.28 |
| DZ-38 | 36.1 | 5.64 | 2.64 | 0.07 | 3.25 | 24.83 | 0.75 | 0.95 | 0.4 | 0.1 | 24.29 | 99.02 | 60.87 | 1.56 | 6.40 |
| DZ-41 | 34.89 | 6.02 | 3.14 | 0.09 | 4.59 | 25.63 | 0.59 | 1 | 0.45 | 0.1 | 24.6 | 101.1 | 65.82 | 1.74 | 5.80 |
| DZ-42 | 40.58 | 6.35 | 3.7 | 0.09 | 4.61 | 21.86 | 0.66 | 1 | 0.54 | 0.12 | 21.65 | 101.16 | 65.34 | 1.77 | 6.39 |
| DZ-44 | 30.68 | 5.04 | 2.49 | 0.13 | 3.8 | 28.51 | 0.55 | 0.86 | 0.38 | 0.1 | 27.38 | 99.92 | 64.00 | 1.74 | 6.09 |
| DZ-46 | 36.78 | 6.6 | 3.58 | 0.09 | 4.7 | 23.27 | 0.51 | 1.14 | 0.51 | 0.12 | 23.38 | 100.68 | 68.75 | 1.67 | 5.57 |

**Table S.4** *(continue)*

| Fm | Sample No. | SiO2 | Al2O3 | Fe2O3 | MnO | MgO | CaO | Na2O | K2O | TiO2 | P2O5 | LOI | Total | CIA | ICV | SiO2/Al2O3 |
| --- | --- | --- | --- | --- | --- | --- | --- | --- | --- | --- | --- | --- | --- | --- | --- | --- |
| Aghajari (Lahbari Member) | DZ-48 | 43.76 | 6.44 | 3.7 | 0.07 | 4.27 | 18.27 | 0.56 | 1.09 | 0.52 | 0.12 | 20.28 | 99.08 | 67.37 | 1.67 | 6.80 |
| DZ-51 | 34.12 | 6.37 | 3.16 | 0.06 | 4.03 | 26.36 | 0.5 | 1.18 | 0.45 | 0.11 | 24.98 | 101.32 | 67.92 | 1.55 | 5.36 |
| DZ-53 | 41.06 | 5.77 | 3.68 | 0.09 | 4.97 | 21.72 | 0.61 | 1.05 | 0.5 | 0.11 | 21.98 | 101.54 | 63.98 | 1.99 | 7.12 |
| DZ-55 | 33.52 | 6.35 | 3.23 | 0.08 | 4.19 | 23.97 | 0.53 | 1.11 | 0.43 | 0.11 | 24.44 | 97.96 | 67.65 | 1.59 | 5.28 |
| DZ-57 | 32.55 | 5.51 | 2.37 | 0.07 | 3.96 | 26.39 | 0.67 | 0.98 | 0.38 | 0.1 | 25.69 | 98.67 | 61.97 | 1.65 | 5.91 |
| DZ-60 | 37.49 | 6.12 | 4.15 | 0.09 | 6.52 | 21.77 | 0.52 | 1.03 | 0.55 | 0.12 | 23.44 | 101.8 | 67.73 | 2.19 | 6.13 |
| DZ-63 | 36.89 | 6.32 | 2.8 | 0.06 | 3.55 | 23.51 | 0.66 | 1.11 | 0.4 | 0.11 | 23.9 | 99.31 | 64.44 | 1.46 | 5.84 |
| DZ-65 | 38.34 | 7.1 | 3.26 | 0.07 | 4.01 | 21.77 | 0.73 | 1.21 | 0.45 | 0.11 | 22.64 | 99.69 | 64.91 | 1.47 | 5.40 |
| DZ-67 | 34.08 | 7.82 | 3.81 | 0.08 | 4.39 | 24.9 | 0.57 | 1.47 | 0.49 | 0.12 | 24.07 | 101.8 | 68.69 | 1.46 | 4.36 |
| DZ-70 | 40.9 | 5.61 | 2.77 | 0.08 | 3.51 | 21.57 | 0.62 | 0.99 | 0.45 | 0.1 | 22.18 | 98.78 | 63.54 | 1.61 | 7.29 |
| DZ-73 | 34.64 | 6.54 | 2.9 | 0.07 | 3.63 | 24.71 | 0.63 | 1.17 | 0.41 | 0.11 | 24.62 | 99.43 | 65.48 | 1.44 | 5.30 |
| DZ-74 | 43.51 | 8.64 | 3.95 | 0.06 | 4.14 | 18.46 | 0.63 | 1.61 | 0.55 | 0.13 | 19.21 | 100.89 | 68.77 | 1.34 | 5.04 |
| DZ-77 | 36.17 | 7.45 | 3.33 | 0.06 | 2.57 | 26.37 | 0.46 | 1.31 | 0.47 | 0.1 | 23.36 | 101.65 | 71.22 | 1.16 | 4.86 |
| DZ-79 | 35.13 | 7.18 | 3.23 | 0.07 | 3.48 | 23.55 | 0.54 | 1.19 | 0.43 | 0.11 | 23.48 | 98.39 | 69.45 | 1.32 | 4.89 |
| DZ-81 | 37.95 | 5.7 | 2.43 | 0.05 | 3.07 | 24.51 | 0.54 | 0.96 | 0.37 | 0.09 | 23.56 | 99.23 | 66.21 | 1.40 | 6.66 |
| DZ-83 | 38.97 | 7.82 | 3.44 | 0.07 | 2.88 | 23.61 | 0.71 | 1.43 | 0.47 | 0.11 | 21.43 | 100.94 | 66.12 | 1.24 | 4.98 |
| DZ-85 | 33.88 | 6.18 | 2.93 | 0.08 | 4.29 | 26.99 | 0.71 | 1.12 | 0.43 | 0.11 | 24.63 | 101.35 | 62.73 | 1.66 | 5.48 |

**Table S.5.** *Trace and rare earth element concentrations (ppm) for the studied mudrocks of the Gachsaran, Mishan, and Aghajari (including the Lahbari Mb.) formations*

| Fm. | Sample No. | Rb | Ba | Sr | Th | U | Zr | Nb | Hf | Ta | Y | Cr | Co | Ni | V | Sc | La | Ce | Pr | Nd | Sm | Eu | Gd | Tb | Dy | Ho | Er | Tm | Yb | Lu |
| --- | --- | --- | --- | --- | --- | --- | --- | --- | --- | --- | --- | --- | --- | --- | --- | --- | --- | --- | --- | --- | --- | --- | --- | --- | --- | --- | --- | --- | --- | --- |
| Gachsaran | DZ-87 | 61.7 | 191.1 | 163.1 | 4.15 | 1.51 | 156 | 10.5 | 5.5 | 0.8 | 19 | 265 | 14.6 | 124.5 | 94 | 12 | 21 | 42 | 4.71 | 17.5 | 3.5 | 0.93 | 3.97 | 0.53 | 3.36 | 0.7 | 2.11 | 0.29 | 1.96 | 0.33 |
| DZ-89 | 65.3 | 148.3 | 447.5 | 6.68 | 3.02 | 104 | 7 | 2.7 | 0.6 | 17.3 | 123 | 7.8 | 54.6 | 97 | 10.5 | 16.9 | 33.9 | 4.05 | 15.4 | 3.18 | 0.76 | 3.3 | 0.45 | 2.78 | 0.56 | 1.66 | 0.24 | 1.7 | 0.23 |
| DZ-90 | 71.3 | 165.1 | 497.4 | 7.71 | 2.61 | 72 | 7.3 | 2.1 | 0.7 | 18 | 122 | 11.1 | 68.9 | 125 | 11 | 19.8 | 39.6 | 4.66 | 17.4 | 3.56 | 0.85 | 3.49 | 0.5 | 3.21 | 0.64 | 1.81 | 0.28 | 1.67 | 0.27 |
| DZ-91 | 56 | 136.3 | 223.3 | 6.41 | 2.53 | 92 | 6.4 | 2.3 | 0.6 | 14.7 | 200 | 11.4 | 88.7 | 82 | 8.2 | 15 | 31.2 | 3.65 | 14 | 2.81 | 0.67 | 2.99 | 0.4 | 2.42 | 0.5 | 1.42 | 0.2 | 1.31 | 0.21 |
| Mishan | DZ-92 | 48.6 | 132.3 | 250.1 | 6.33 | 2.36 | 106 | 6.8 | 2.9 | 0.7 | 16.3 | 135 | 7.4 | 43.7 | 61 | 7.5 | 15.6 | 32.3 | 3.79 | 14.7 | 2.99 | 0.67 | 3.01 | 0.44 | 2.69 | 0.54 | 1.58 | 0.24 | 1.55 | 0.23 |
| DZ-93 | 59.1 | 198 | 219.2 | 6.36 | 2.43 | 94 | 7.5 | 2.6 | 0.7 | 17.1 | 101 | 8.7 | 46.7 | 81 | 9 | 16.6 | 34.1 | 3.99 | 15.5 | 3.15 | 0.74 | 3.15 | 0.47 | 2.85 | 0.59 | 1.65 | 0.25 | 1.6 | 0.24 |
| DZ-94 | 79.5 | 238.9 | 272.2 | 8.27 | 3.07 | 95 | 7.6 | 2.5 | 0.7 | 17.5 | 104 | 8.5 | 44.3 | 105 | 11.2 | 18.9 | 38.1 | 4.6 | 16.9 | 3.46 | 0.75 | 3.37 | 0.46 | 2.89 | 0.59 | 1.77 | 0.25 | 1.63 | 0.26 |
| DZ-1 | 72.6 | 178.8 | 244.8 | 5.4 | 2.4 | 85 | 6.4 | 2.1 | 0.7 | 15.4 | 98 | 11.3 | 71.9 | 78 | 10.1 | 16.6 | 34.1 | 3.95 | 14.8 | 3.13 | 0.71 | 3.1 | 0.41 | 2.56 | 0.54 | 1.53 | 0.24 | 1.5 | 0.24 |
| Aghajari | DZ-2 | 57.4 | 187.6 | 235.2 | 5.44 | 2.3 | 84 | 5.8 | 2.2 | 0.6 | 16 | 69 | 12.6 | 38.1 | 66 | 8.3 | 17.9 | 35.6 | 4.07 | 15.5 | 3.23 | 0.71 | 3.31 | 0.44 | 2.73 | 0.52 | 1.56 | 0.23 | 1.27 | 0.22 |
| DZ-4 | 70.9 | 208.5 | 254.5 | 4.45 | 1.93 | 103 | 8.2 | 3.4 | 0.8 | 17.8 | 96 | 13.7 | 58.9 | 105 | 11.2 | 19.9 | 39.9 | 4.56 | 17 | 3.31 | 0.81 | 3.4 | 0.48 | 3 | 0.62 | 1.82 | 0.28 | 1.78 | 0.27 |
| DZ-6 | 84.6 | 261.6 | 161 | 8.91 | 2.1 | 121 | 11.9 | 3.6 | 1 | 23.2 | 135 | 16.5 | 57.3 | 105 | 14.5 | 25.6 | 53.5 | 6.08 | 22.8 | 4.54 | 1.06 | 4.5 | 0.65 | 3.92 | 0.79 | 2.39 | 0.36 | 2.33 | 0.33 |
| DZ-8 | 48 | 157.5 | 295.1 | 5.45 | 2.11 | 88 | 5.5 | 2.2 | 0.6 | 14.3 | 132 | 8.4 | 44.7 | 57 | 7.4 | 15.2 | 31.2 | 3.68 | 13.8 | 2.92 | 0.65 | 2.94 | 0.42 | 2.47 | 0.48 | 1.41 | 0.2 | 1.29 | 0.21 |
| DZ-8b | 48 | 153.6 | 270.3 | 3.19 | 1.83 | 115 | 6.2 | 3.7 | 0.6 | 14.3 | 121 | 9.4 | 47 | 71 | 7.4 | 15.4 | 30.3 | 3.55 | 13 | 2.62 | 0.63 | 2.81 | 0.39 | 2.44 | 0.52 | 1.42 | 0.22 | 1.46 | 0.22 |
| DZ-10 | 58.9 | 249.6 | 213 | 4.42 | 1.8 | 127 | 9.5 | 4.2 | 0.6 | 17.9 | 108 | 13.1 | 60.7 | 102 | 11 | 20.4 | 41.2 | 4.71 | 17.4 | 3.5 | 0.82 | 3.64 | 0.48 | 3.14 | 0.63 | 1.85 | 0.26 | 1.87 | 0.27 |
| DZ-12 | 90.6 | 291.3 | 144.5 | 6.8 | 1.97 | 144 | 13.2 | 4.8 | 0.8 | 22.8 | 92 | 13.3 | 47.1 | 120 | 12.6 | 29.2 | 60.7 | 6.68 | 24.1 | 4.88 | 1.06 | 5.08 | 0.66 | 4.13 | 0.85 | 2.58 | 0.37 | 2.46 | 0.36 |
| DZ-15 | 61.3 | 275.5 | 212.5 | 3.92 | 1.52 | 132 | 8.9 | 3.8 | 0.7 | 17.4 | 121 | 13.5 | 57.8 | 106 | 10.8 | 19.2 | 39 | 4.48 | 16.4 | 3.32 | 0.8 | 3.54 | 0.47 | 2.99 | 0.6 | 1.88 | 0.27 | 1.74 | 0.27 |
| DZ-18 | 42.6 | 236.1 | 345.2 | 5.29 | 1.81 | 98 | 6.6 | 2.6 | 0.6 | 16.9 | 128 | 8.7 | 47.8 | 73 | 8.7 | 17 | 33.6 | 4.03 | 15.4 | 3.16 | 0.79 | 3.12 | 0.47 | 2.8 | 0.56 | 1.69 | 0.24 | 1.53 | 0.25 |
| DZ-22 | 22.9 | 107.5 | 259 | 3.62 | 1.25 | 99 | 4.3 | 2.4 | 0.4 | 11.5 | 270 | 5.1 | 34.2 | 34 | 4.9 | 12.1 | 24.4 | 2.92 | 11.3 | 2.32 | 0.52 | 2.23 | 0.33 | 1.96 | 0.37 | 1.2 | 0.16 | 1.1 | 0.18 |
| DZ-24 | 36.2 | 160.2 | 235.6 | 2.63 | 1.28 | 102 | 5.4 | 3.4 | 0.6 | 14.1 | 89 | 7 | 29.3 | 66 | 7.2 | 16.8 | 32.6 | 3.93 | 14.2 | 2.88 | 0.7 | 2.97 | 0.43 | 2.42 | 0.49 | 1.57 | 0.21 | 1.4 | 0.2 |
| DZ-25 | 48.9 | 192.3 | 378.6 | 5.6 | 2.43 | 110 | 6.7 | 3 | 0.7 | 19.5 | 166 | 7.6 | 39.3 | 81 | 8 | 18.2 | 37.6 | 4.55 | 17.5 | 3.6 | 0.87 | 3.67 | 0.52 | 3.09 | 0.64 | 1.91 | 0.29 | 1.74 | 0.3 |
| DZ-35 | 41.1 | 207.2 | 247.8 | 4.94 | 1.81 | 101 | 7.1 | 2.7 | 0.6 | 15.9 | 132 | 9.4 | 56.3 | 67 | 8.3 | 15.7 | 32.4 | 3.85 | 14.8 | 3.23 | 0.73 | 3.26 | 0.46 | 2.82 | 0.56 | 1.62 | 0.23 | 1.47 | 0.23 |
| DZ-38 | 32.7 | 211.1 | 276.6 | 4.54 | 1.6 | 104 | 6.7 | 2.9 | 0.6 | 15.5 | 165 | 8.1 | 47.6 | 63 | 7.2 | 16.1 | 33.4 | 4 | 15.1 | 3.09 | 0.75 | 3.05 | 0.43 | 2.63 | 0.51 | 1.53 | 0.22 | 1.48 | 0.22 |
| DZ-41 | 33.4 | 170 | 222.2 | 2.43 | 1.3 | 84 | 7.7 | 2.8 | 0.7 | 15.1 | 167 | 11.7 | 72.5 | 78 | 7.7 | 16.7 | 33.5 | 3.93 | 14.3 | 3.01 | 0.79 | 3.23 | 0.44 | 2.71 | 0.54 | 1.5 | 0.23 | 1.38 | 0.21 |
| DZ-42 | 29.6 | 243.7 | 209.3 | 2.12 | 1.18 | 92 | 8.9 | 3.5 | 0.7 | 15.4 | 300 | 14.8 | 96.9 | 74 | 8.2 | 16.3 | 33.5 | 3.85 | 14.4 | 2.87 | 0.81 | 3.13 | 0.44 | 2.75 | 0.53 | 1.55 | 0.23 | 1.43 | 0.22 |
| DZ-44 | 29 | 141.8 | 258.2 | 3.82 | 1.44 | 88 | 5.9 | 2.3 | 0.5 | 14.3 | 170 | 8.3 | 54.8 | 66 | 6.8 | 14.4 | 30.2 | 3.51 | 13.5 | 2.81 | 0.68 | 2.77 | 0.4 | 2.45 | 0.48 | 1.44 | 0.18 | 1.4 | 0.19 |
| DZ-46 | 37.3 | 161.1 | 208.4 | 2.34 | 1.35 | 80 | 8.4 | 2.9 | 0.8 | 16.2 | 232 | 13.9 | 93.8 | 79 | 8.8 | 17.7 | 36.4 | 4.1 | 14.9 | 3.13 | 0.81 | 3.38 | 0.49 | 2.81 | 0.59 | 1.6 | 0.24 | 1.48 | 0.24 |

**Table S.5** *(continue)*

| Fm. | Sample No. | Rb | Ba | Sr | Th | U | Zr | Nb | Hf | Ta | Y | Cr | Co | Ni | V | Sc | La | Ce | Pr | Nd | Sm | Eu | Gd | Tb | Dy | Ho | Er | Tm | Yb | Lu |
| --- | --- | --- | --- | --- | --- | --- | --- | --- | --- | --- | --- | --- | --- | --- | --- | --- | --- | --- | --- | --- | --- | --- | --- | --- | --- | --- | --- | --- | --- | --- |
| Aghajari (Lahbari Member) | DZ-48 | 34.8 | 151.3 | 192.7 | 4.51 | 1.64 | 115 | 9.9 | 3.1 | 0.8 | 16.2 | 303 | 14.4 | 112.1 | 82 | 9.7 | 16.5 | 34.8 | 4.17 | 16.1 | 3.47 | 0.92 | 3.35 | 0.48 | 2.86 | 0.57 | 1.66 | 0.21 | 1.51 | 0.22 |
| DZ-51 | 38.9 | 168.2 | 240 | 2.9 | 1.47 | 99 | 7.1 | 3.3 | 0.7 | 15.9 | 144 | 9.4 | 56.3 | 77 | 7.6 | 16.7 | 32.7 | 3.9 | 14 | 2.96 | 0.69 | 3.09 | 0.46 | 2.76 | 0.54 | 1.6 | 0.23 | 1.57 | 0.24 |
| DZ-53 | 29.4 | 134.3 | 183 | 2.33 | 1.08 | 82 | 8.6 | 2.7 | 0.8 | 14.5 | 258 | 13.8 | 98.2 | 79 | 8.1 | 16 | 31.8 | 3.7 | 13.8 | 2.76 | 0.81 | 2.93 | 0.44 | 2.51 | 0.5 | 1.47 | 0.21 | 1.32 | 0.19 |
| DZ-55 | 39.8 | 139.8 | 245.8 | 4.56 | 1.73 | 103 | 7.6 | 2.7 | 0.6 | 15.5 | 175 | 10.7 | 72 | 61 | 8.6 | 15.3 | 31.3 | 3.75 | 14.5 | 3.06 | 0.73 | 3.01 | 0.43 | 2.57 | 0.53 | 1.55 | 0.21 | 1.48 | 0.22 |
| DZ-57 | 33.7 | 159 | 239.5 | 4.19 | 1.71 | 104 | 6.2 | 2.7 | 0.6 | 15.3 | 159 | 7.3 | 44.9 | 60 | 6.7 | 14.7 | 29.8 | 3.64 | 12.8 | 2.89 | 0.69 | 2.98 | 0.41 | 2.57 | 0.52 | 1.49 | 0.22 | 1.33 | 0.22 |
| DZ-60 | 29.3 | 127 | 183.2 | 2.32 | 1.24 | 83 | 9.5 | 2.5 | 0.8 | 14.7 | 269 | 16.4 | 119.7 | 87 | 9.1 | 15.5 | 30.6 | 3.59 | 13.4 | 2.72 | 0.75 | 3.1 | 0.43 | 2.58 | 0.49 | 1.46 | 0.22 | 1.35 | 0.21 |
| DZ-63 | 37.8 | 165.8 | 222.9 | 4.67 | 1.77 | 118 | 6.6 | 3.1 | 0.6 | 15.3 | 156 | 7.6 | 46.4 | 59 | 7.6 | 15.6 | 32.3 | 3.77 | 15 | 3.07 | 0.73 | 3.07 | 0.42 | 2.59 | 0.52 | 1.53 | 0.2 | 1.48 | 0.22 |
| DZ-65 | 44.4 | 166.3 | 262.1 | 5.1 | 1.75 | 130 | 7.6 | 3.5 | 0.6 | 17.1 | 197 | 10 | 64 | 87 | 8.8 | 15.7 | 32.5 | 3.92 | 14.7 | 3.17 | 0.73 | 3.1 | 0.47 | 2.74 | 0.55 | 1.62 | 0.24 | 1.51 | 0.23 |
| DZ-67 | 49.9 | 193.1 | 238.5 | 3.47 | 1.57 | 96 | 8 | 3.2 | 0.8 | 16.6 | 136 | 13.4 | 78.1 | 85 | 9.2 | 18.2 | 36.3 | 4.19 | 15.5 | 3.02 | 0.75 | 3.39 | 0.48 | 2.8 | 0.59 | 1.67 | 0.25 | 1.65 | 0.25 |
| DZ-70 | 35.3 | 150.4 | 215.6 | 5.46 | 1.92 | 211 | 8.6 | 5.3 | 0.7 | 18.5 | 343 | 7.8 | 41.2 | 67 | 7.4 | 17.8 | 37.2 | 4.34 | 16.9 | 3.52 | 0.75 | 3.5 | 0.52 | 2.98 | 0.67 | 1.78 | 0.28 | 1.66 | 0.27 |
| DZ-73 | 44.3 | 211.7 | 314.3 | 5.1 | 2.05 | 113 | 7.2 | 2.7 | 0.6 | 18 | 134 | 8.8 | 48.9 | 65 | 8.1 | 16.4 | 33.7 | 3.98 | 15 | 3.32 | 0.77 | 3.3 | 0.48 | 2.76 | 0.58 | 1.77 | 0.26 | 1.59 | 0.25 |
| DZ-74 | 52.5 | 194.6 | 251.3 | 3.2 | 1.79 | 112 | 8.6 | 4.1 | 0.7 | 16.6 | 152 | 11.9 | 61.7 | 89 | 9.4 | 18.6 | 37.6 | 4.37 | 15.8 | 3.46 | 0.81 | 3.42 | 0.48 | 2.84 | 0.58 | 1.85 | 0.27 | 1.73 | 0.26 |
| DZ-77 | 42.8 | 160.7 | 191.2 | 2.89 | 1.23 | 98 | 6.9 | 3.2 | 0.7 | 15.1 | 118 | 9.9 | 54.3 | 72 | 8.3 | 16.1 | 32.8 | 3.76 | 13.8 | 2.74 | 0.68 | 2.99 | 0.4 | 2.43 | 0.52 | 1.55 | 0.23 | 1.47 | 0.22 |
| DZ-79 | 45.8 | 168.4 | 239.1 | 5.15 | 1.87 | 117 | 7.5 | 3.1 | 0.6 | 16.4 | 155 | 9.3 | 57.5 | 65 | 9 | 16.4 | 33.6 | 3.85 | 15.3 | 3.15 | 0.76 | 3.04 | 0.44 | 2.64 | 0.54 | 1.63 | 0.23 | 1.57 | 0.24 |
| DZ-81 | 35.4 | 153.6 | 226.5 | 4.29 | 1.65 | 109 | 7 | 2.9 | 0.7 | 14.6 | 186 | 6.2 | 35.9 | 56 | 6.8 | 14.2 | 28.5 | 3.5 | 13.3 | 2.71 | 0.66 | 2.61 | 0.42 | 2.44 | 0.5 | 1.5 | 0.21 | 1.32 | 0.22 |
| DZ-83 | 48.1 | 194.1 | 216.1 | 3.18 | 1.49 | 103 | 7.8 | 3.7 | 0.8 | 16 | 104 | 10.8 | 48.9 | 79 | 8.5 | 18.7 | 36.9 | 4.23 | 15.7 | 3.19 | 0.75 | 3.37 | 0.47 | 2.78 | 0.57 | 1.78 | 0.25 | 1.58 | 0.22 |
| DZ-85 | 32.6 | 152.4 | 247.5 | 2.73 | 1.39 | 93 | 6 | 3 | 0.6 | 15.2 | 151 | 10.4 | 62.8 | 74 | 7.1 | 15.7 | 31 | 3.58 | 13.3 | 2.82 | 0.69 | 2.83 | 0.43 | 2.56 | 0.53 | 1.6 | 0.21 | 1.52 | 0.21 |

|  | Sandstones | | | Mudrocks | | | | | | | | | | | |
| --- | --- | --- | --- | --- | --- | --- | --- | --- | --- | --- | --- | --- | --- | --- | --- |
| Qm/Qp | K/P | MIA | Lan/Ybn | Lan/Smn | Eu/Eu* | Gdn/Ybn | SiO2/Al2O3 | CIA | ICV | Th/U | Zr/Sc | Rb/Sr | Cr(ppm) | MgO(%) |
| Lahbari Mb. | 1.8 | 3.1 | 79.1 | 7.34 | 3.38 | 0.74 | 1.68 | 5.69 | 66.36 | 1.54 | 2.38 | 14 | 0.17 | 184.7 | 3.97 |
| Aghajari Fm. | 1.7 | 3.3 | 76.9 | 7.67 | 3.48 | 0.72 | 1.71 | 5.16 | 65.90 | 1.40 | 2.53 | 12 | 0.22 | 149.6 | 3.51 |
| Mishan Fm. | - | - | - | 7.28 | 3.34 | 0.69 | 1.63 | 4.32 | 68.05 | 1.38 | 2.56 | 10 | 0.26 | 109.5 | 4.37 |
| Gachsaran Fm. | - | - | - | 7.43 | 3.50 | 0.73 | 1.69 | 4.25 | 68.54 | 1.64 | 2.61 | 10 | 0.23 | 177.5 | 6.61 |
| Ahwaz Mb. | 43.9 | 1.4 | 96.3 | - | - | - | - | 74 | - | - | - | 150 | - | 21.94 | 0.40 |

**Table S.6.** *Summary of compositional and elemental ratios of the studied Neogene sandstones and mudrocks and published data from the Ahwaz Member in the Dezful embayment (Avarjani et al., 2014).*

**Table S.7.** *Elemental ratios of the studied Neogene mudrocks and published data from the Ahwaz sandstone Member in the Dezful Embayment (Avarjani et al., 2014), compared to those of sediments derived from felsic and mafic rocks (Cullers, 2000)*

| Elemental ratio | Range of sediments from felsic rocks† | Range of sediments from mafic rocks† | Gachsaran Fm. (n=4) | | Mishan Fm. (n=4) | | Aghajari Fm. (n=18) | | Lahbari Mb. (n=17) | | Ahwaz Sandstone Mb. (n=18)‡ | |
| --- | --- | --- | --- | --- | --- | --- | --- | --- | --- | --- | --- | --- |
| Range | Mean | Range | Mean | Range | Mean | Range | Mean | Range | Mean |
| La/Sc | 0.7-27.7 | 0.4-1.1 | 1.61-1.83 | 1.75 | 1.64-2.08 | 1.81 | 1.77-2.47 | 2.07 | 1.70-2.41 | 2.00 | 4.00-8.35 | 5.91 |
| La/Co | 1.4-22.4 | 0.14-0.38 | 1.32-2.17 | 1.68 | 1.47-2.22 | 1.93 | 1.10-2.40 | 1.74 | 0.95-2.29 | 1.65 | 0.36-13.92 | 4.40 |
| Th/Sc | 0.64-18.1 | 0.05-0.4 | 0.35-0.78 | 0.62 | 0.53-0.84 | 0.71 | 0.26-0.74 | 0.51 | 0.25-0.74 | 0.48 | 1.12-3.75 | 1.68 |
| Th/Co | 0.3-7.5 | 0.04-1.4 | 0.28-0.86 | 0.60 | 0.48-0.97 | 0.76 | 0.14-0.74 | 0.44 | 0.14-0.70 | 0.41 | 0.09-6.25 | 1.33 |
| Th/Cr | 0.067-4.0 | 0.002-0.045 | 0.02-0.06 | 0.04 | 0.05-0.08 | 0.06 | 0.01-0.08 | 0.04 | 0.01-0.04 | 0.02 | 0.04-0.25 | 0.09 |
| Eu/Eu* | 0.32-0.83 | 0.7-1.02 | 0.71-0.76 | 0.73 | 0.67-0.72 | 0.69 | 0.65-0.83 | 0.72 | 0.65-0.87 | 0.74 | - | - |
| Lan/Lun | 3.00-27.0 | 1.10-7.00 | 6.61-7.63 | 7.32 | 7.04-7.55 | 7.24 | 6.30-8.72 | 7.66 | 6.70-8.82 | 7.45 | - | - |
| † Cullers (2000)  ‡Avarjani et al. (2014)  Eu/Eu*= Eun/[(Smn)(Gdn)]1/2 (Subscript n denotes chondrite normalized value) | | | | | | | | | | | | |
